# Supplementary material for: Poly(ε-caprolactone)/cellulose nanocrystal nanocomposite mechanical reinforcement and morphology: the role of nanocrystal pre-dispersion
Source: Springer Nature journal article supplement (doi:10.1007/s10853-018-2860-9), 2018-08-31
Supplement: MOESM1 [file 16090284]

SUPPLEMENTARY INFORMATION

**Poly(ε-caprolactone)/cellulose nanocrystal nanocomposite mechanical reinforcement and morphology: the role of nanocrystal pre-dispersion**

Luiz G. L. Germiniani¹, Laura C. E. da Silva¹, Tomás S. Plivelic², Maria C. Gonçalves¹

1 - Institute of Chemistry, University of Campinas (UNICAMP), P. O. Box 6154,

Campinas, 13083-970, Brazil.

2 - MAX IV Laboratory, Lund University, P.O. Box 118 SE-221 00 Lund, Sweden.

*Corresponding Author:*

Maria C. Gonçalves, e-mail: [maria@iqm.unicamp.br](mailto:maria@iqm.unicamp.br)

**S1. Cellulose Nanocrystals Water-THF Dispersion Stability**

In the solvent exchange methodology the CNC aqueous dispersion was progressively diluted in THF in order to promote a gradual solvent transition from water to organic solvent. The process was carried out from a water-THF mixture containing 60 wt% THF to 85 wt% THF. This final concentration was selected based on previous results related to the stability of 1 wt% CNC dispersion in water-THF medium with different solvent proportions. Fig. S1 shows a progressive reduction of the CNC dispersion stability with the THF content increase. The higher the THF content, the more the suspension became opaque and unstable, as can be seen by the CNC sedimentation in the flask bottom.


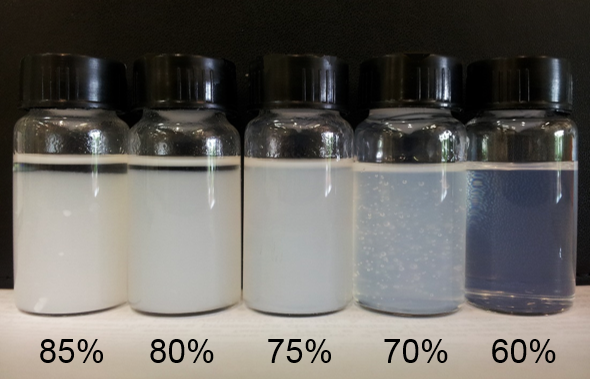


**Fig. S1** CNC suspensions (1 wt%) in different water-THF proportions. The indicated percentages represent the THF mass fractions in the dispersion media.

**S2. Cellulose Nanocrystal SAXS Characterization**

In order to estimate the CNC dimensions from the scattering data, the PCL/CNC5 sample was analyzed in the amorphous state. The scattered intensity and the fittings are presented in Fig. S2. The SASview, v4.1.2 software was used [1].

**Fig. S2** SasView® fit form cylindrical model (red) and amorphous polymer scattering (blue) on experimental data for PCL/CNC5 molten nanocomposite.

The main part of the scattering data is generated by the CNC nanoparticles and can be properly fitted using the scattering from a polydisperse system of cylinders (red line). The mean radius, <r>, obtained was 2.0 nm, whereas the polydispersity, PD was 0.3 % (PD = σr/<r> considering a Gaussian distribution of radius). The longitudinal size of the CNC, L, was not possible to determine because it was out of the detection q-range, L>100 nm.

The low q-region of the SAXS data, followed a power law behaviour, I(q) ∝ q-α, where α = 3.0 ± 0.6. This is a typical value observed from amorphous polymers [2], i.e., molten PCL in this case.

The amorphous state for PCL/CNC40 was also analyzed for a comparative purpose. No significant differences were observed in the overall characteristics and in the resulting fitting parameter.

**S3. Cellulose Nanocrystals FTIR Spectrum and Description**

Freeze-dried CNC infrared spectrum was recorded using the total attenuated reflectance method in a Cary 630 FTIR X-ray spectrophotometer (Agilent). The spectrum acquisition was carried out with 64 scans using a 4000 to 400 cm-1 wavenumber range and a 4 cm-1 resolution.

The FTIR spectrum shown in Fig. S3 presents 1227 cm­-1, 1077 cm-1 and 813 cm-1 sulfate bands. The first two can be associated to asymmetric O-S-O stretching and symmetric O-S-O stretching, respectively [3]. The third, although it shifted to smaller values of wavenumber, can be related to the S-O-C stretching [3], since it is not related to CNC structure. Other bands related to sulfate groups could not be observed.

**Fig. S3** Freeze dried CNC infrared spectrum (a) and selected region, highlighting characteristic sulfate group bands (b).

**S4. Cellulose Nanocrystal FTIR Results and Description**

A freeze-dried sample of aqueous CNC suspension was analyzed in a XRD7000 X-ray diffractometer (Shimadzu). Measurements used CuKα radiation (λ= 0.15406 nm) at 40 kV and 30 mA. Diffraction patterns were acquired in a 5 to 50° range.

**Fig. S4** Freeze dried CNC diffractogram.

The XRD pattern clearly shows that the nanoparticles are made up of both Cellulose I (peaks at 15°, 17° and 35°) and Cellulose II (peak at 12.5°) structural forms.

**S5. PCL and PCL/CNC Nanocomposite Photographs**

Fig. S5 shows a photograph of the nanocomposite film samples. The photograph exhibits both film surfaces, where bottom and top rows refer to the surface in contact with the glass substrate and the free surface, respectively.


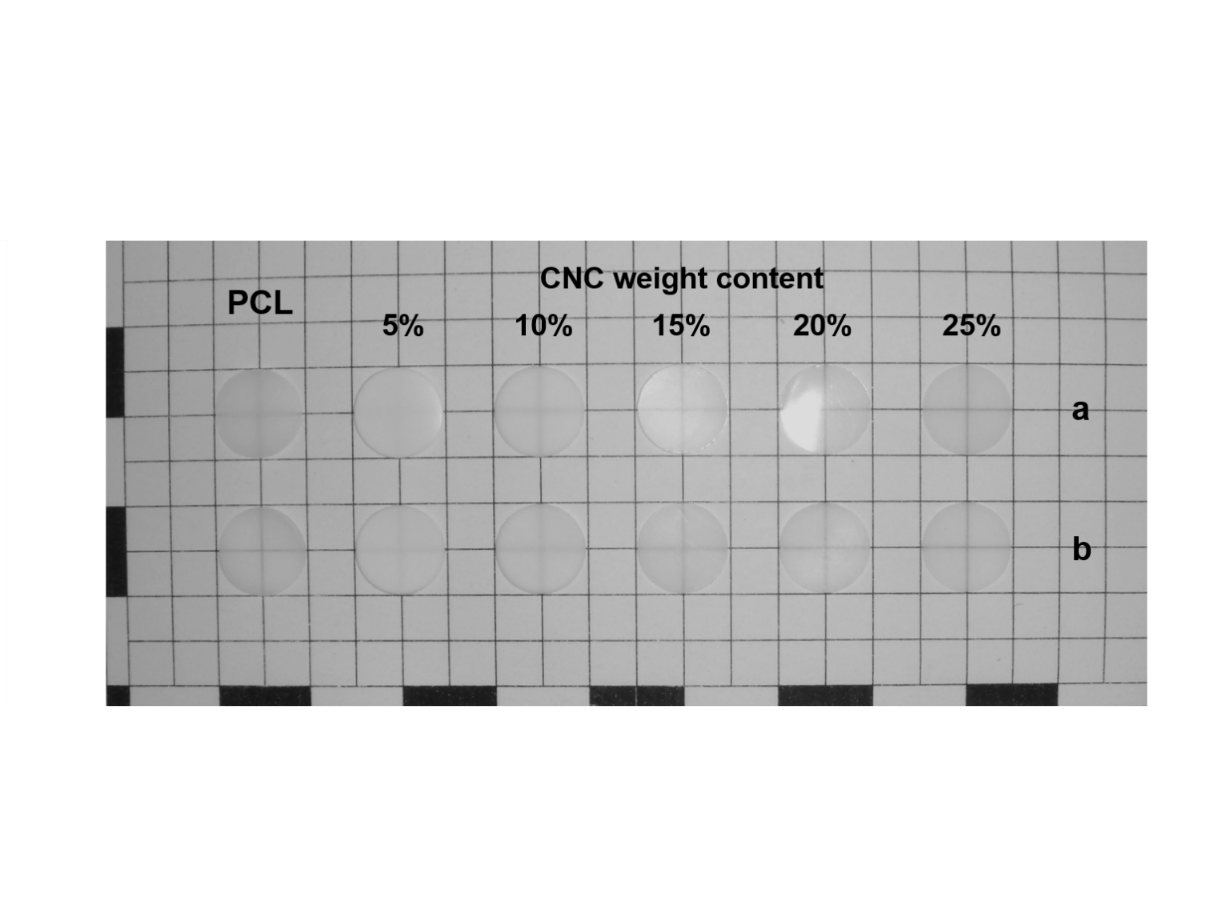


**Fig. S5** Neat PCL and PCL/CNC nanocomposite films. The first row (a) refers to the bottom film surface and the second row (b) to the top surface.

**S6. PCL and PCL/CNC Nanocomposites DSC Curves**

**Fig. S6** DSC curves for heating and cooling of PCL and nanocomposite films.

**S7. PCL and PCL/CNC5 TEM images**


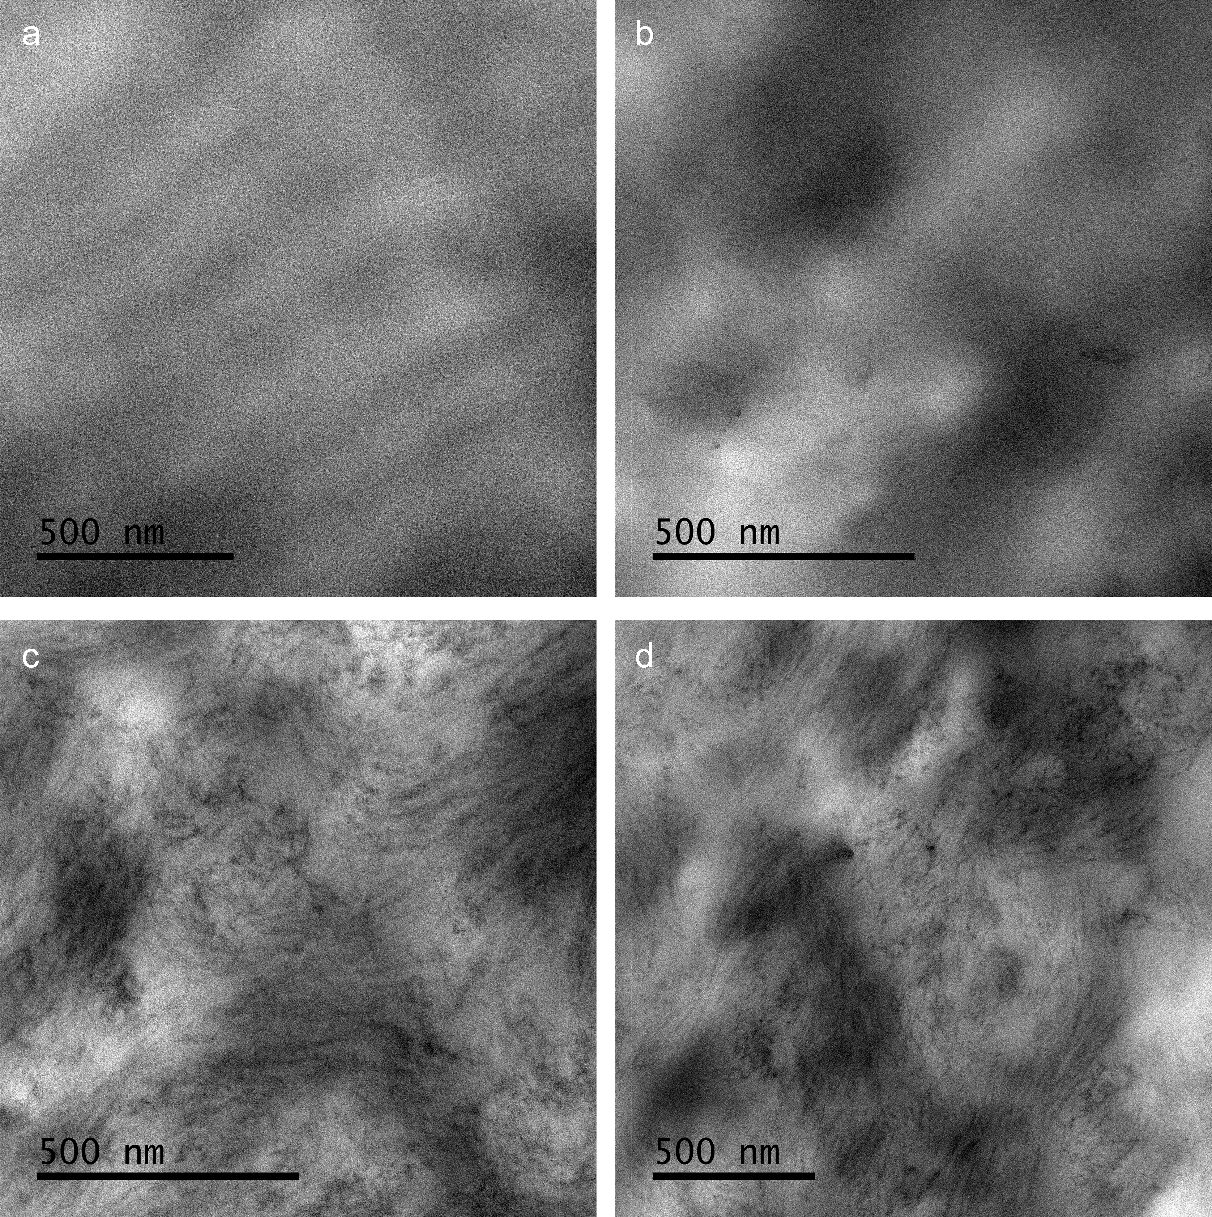


**Fig. S7** TEM micrographs of PCL (a), PCL/CNC5 (b) and PCL/CNC25 (c,d) nanocomposites.

**S8. Results and Additional Data Processing Information**

Fig. S8 shows the azimuthally integrated SAXS curves, which were normalized and corrected by the background subtraction.

**Fig. S8** SAXS curves for PCL and PCL/CNC nanocomposite films.

The CNC contribution to the scattering pattern was estimated using the scattering pattern from the molten PCL/CNC40 nanocomposite. The scattering pattern and the integrated curve are presented in Fig. S9.

**Fig. S9** SAXS curves for CNC in the molten state of the PCL/CNC40 nanocomposite. 2D image (a), azimuthally integrated 1D curve (b).

No differences were observed analyzing the scattering intensity from different molten nanocomposites, except in a scale factor.

PCL lamellar parameters were determined using the one dimensional correlation function [4,5]. Firstly, to isolate the polymer scattering, filler CNC contribution was subtracted from each SAXS curve considering the CNC content in each case. Then, the intensity curves were smoothed and extrapolated to q = 0 and q = ∞, and Fourier transform according to Eq. (5) on the main text. SAXDAT software [4] was used for these calculations.

The Long period (L) parameter was taken from the first maximum position of the correlation functions (Fig. 9), while the first phase thickness, in this case, the amorphous region thickness (la), was determined from the self-correlation triangle parameters defined as:

(A1)

where ymin is the minimum of the correlation function, B is the angular coefficient determined from the linear fit region and Qid is the linear coefficient of the fit.

The second phase thickness, the crystalline lamellae thickness (lc), was determined by the relation (lc = L-la).

The proper correlation of the parameters with the crystalline and amorphous phases was established using the DSC data [6]. The largest values for the parameters were identified as the lamellar thickness. A set of values for the PCL lamellar parameters was obtained for each curve.

**References**

[1] A. Doucet, Mathieu; Cho, Jae Hie; Alina, Gervaise; Bakker, Jurrian; Bouwman, Wim; Butler, Paul; Campbell, Kieran; Gonzales, Miguel; Heenan, Richard; Jackson, Andrew; Juhas, Pavol; King, Stephen; Kienzle, Paul; Krzywon, Jeff; Markvardsen, Anders; Nielsen, Tor, SasView, (2017). doi:doi.org/10.5281/zenodo.825675.

[2] A.M. Jonas, D.A. Ivanov, D.Y. Yoon, The Semicrystalline Morphology of Poly(ether-ether-ketone) Blends with Poly(ether-imide), Macromolecules. 31 (1998) 5352–5362.

[3] G. Socrates, Infrared and Raman Characteristic Group Frequencies, third ed., John Wiley & Sons, New York, 2001.

[4] S. Rabiej, M. Rabiej, Determination of the parameters of lamellar structure of semicrystalline polymers using a computer program SAXSDAT, Polimery. 56 (2011) 662–670.

[5] G.R. Strobl, M. Schneider, Direct evaluation of the electron density correlation function of partially crystalline polymers, J. Polym. Sci. Polym. Phys. Ed. 18 (1980) 1343–1359.

[6] S. Plivelic, S.N. Cassu, M. do C. Gonçalves, I.L. Torriani, Structure and Morphology of Poly(ε-caprolactone )/Chlorinated Polyethylene (PCL/PECl) Blends Investigated by DSC, Simultaneous SAXS/WAXD, and Elemental Mapping by ESI-TEM, Macromolecules. 40 (2007) 253–264.
